# Supplementary material
Source: HighWire-hosted journal article supplement (https://jnm.snmjournals.org/highwire/filestream/95081/field_highwire_adjunct_files/0/182410_Supplemental_Data.pdf)
Supplement: 182410_Supplemental_Data.pdf [file 182410_Supplemental_Data.pdf]

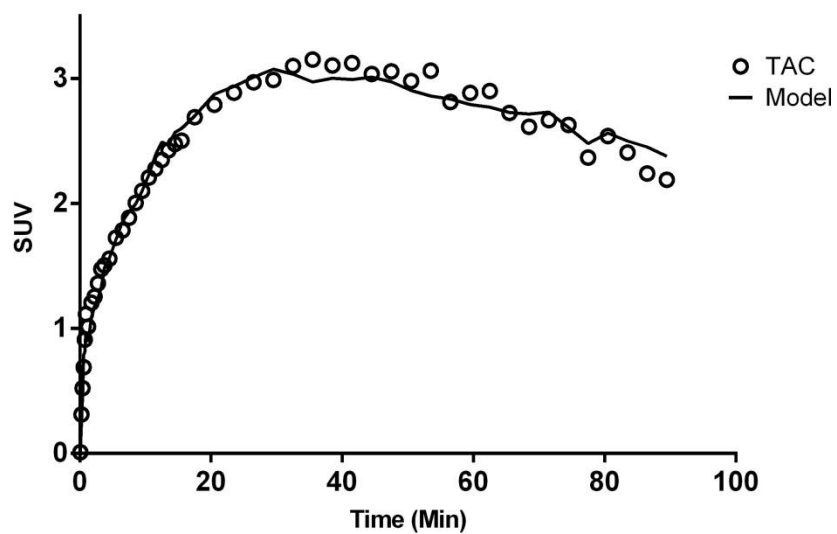

**Supplemental fig. 1.** An example of a representative SRTM fit to the TAC of striatum.

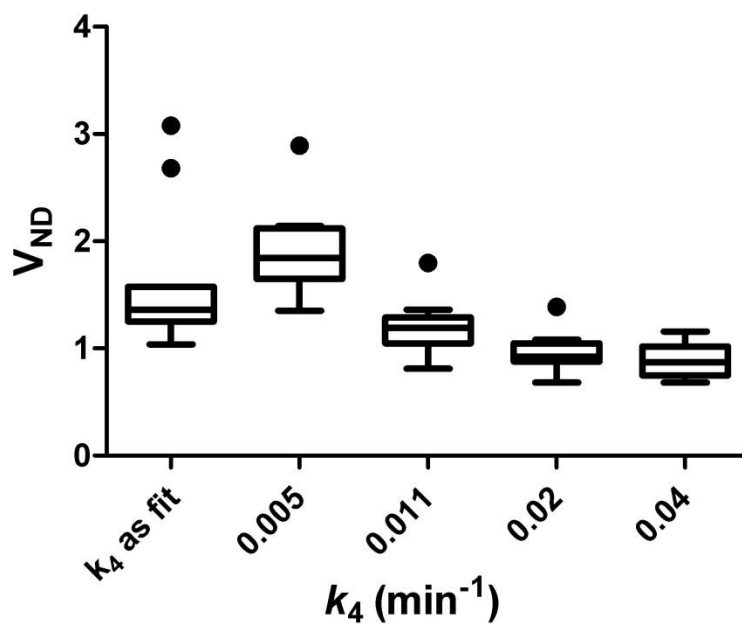

**Supplemental fig. 2.** Tukey's boxplots of the effect of  $k_4$  on  $V_{ND}$ .  $V_{ND}$  was obtained as  $V_T$  in cerebellum from 7 baseline scans and as  $V_T$  in striatum from 3 scans with preladenant preblocking.

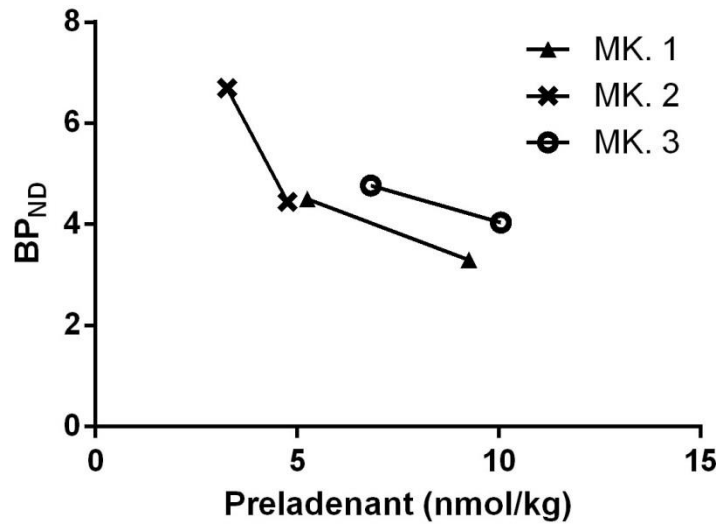

**Supplemental fig. 3.** Relationship between injected mass of unlabeled preladenant and apparent  $BP_{ND}$  at baseline. Each monkey underwent 2 baseline scans with time intervals of ~1 month. MK = monkey

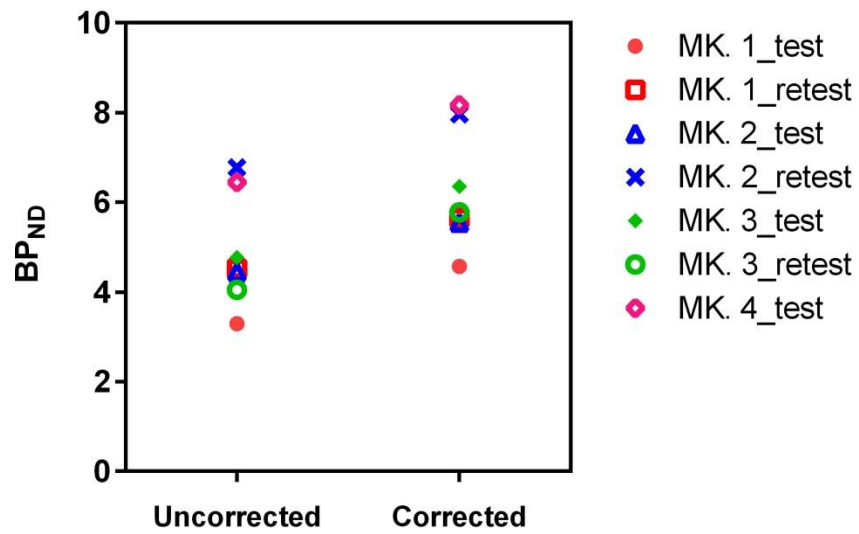

**Supplemental fig. 4.** Comparison of  $BP_{ND}$  with and without correction for self-occupancy by unlabeled preladenant.  $BP_{ND}$  was obtained from SRTM from 7 baseline scans. MK = monkey
